# Supplementary material
Source: Springer Nature journal article supplement (https://www.springermedizin.de/resource/supplementary/12884_2014_1185_MOESM1_ESM.pdf/9459098)

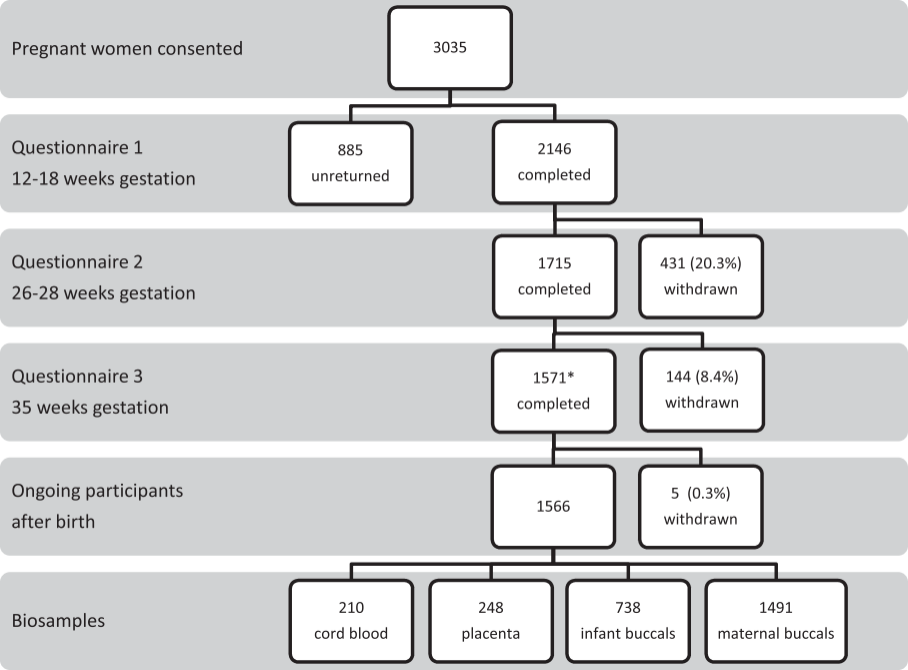

Supplement: MOESM1 [file 9459098]
